# Supplementary material for: A Au nanoflower@SiO2@CdTe/CdS/ZnS quantum dot multi-functional nanoprobe for photothermal treatment and cellular imaging
Source: Royal Society of Chemistry journal article supplement (doi:10.1039/c4ra02965h), 2014-01-01
Supplement: c4ra02965h1.pdf [file c4ra02965h1.pdf]

### Supporting Information for

Au nanoflower@SiO<sub>2</sub>@CdTe/CdS/ZnS quantum dots multi-functional nanoprobes for photothermal treatment and cellular imaging

Tongtong Jiang,<sup>a</sup> Naiqiang Yin,<sup>a</sup> Ling Liu,<sup>a</sup> Jiangluqi Song,<sup>a</sup> Qianpeng Huang,<sup>b</sup> Lixin Zhu,<sup>\*b</sup> Xiaoliang Xu<sup>\*a</sup>

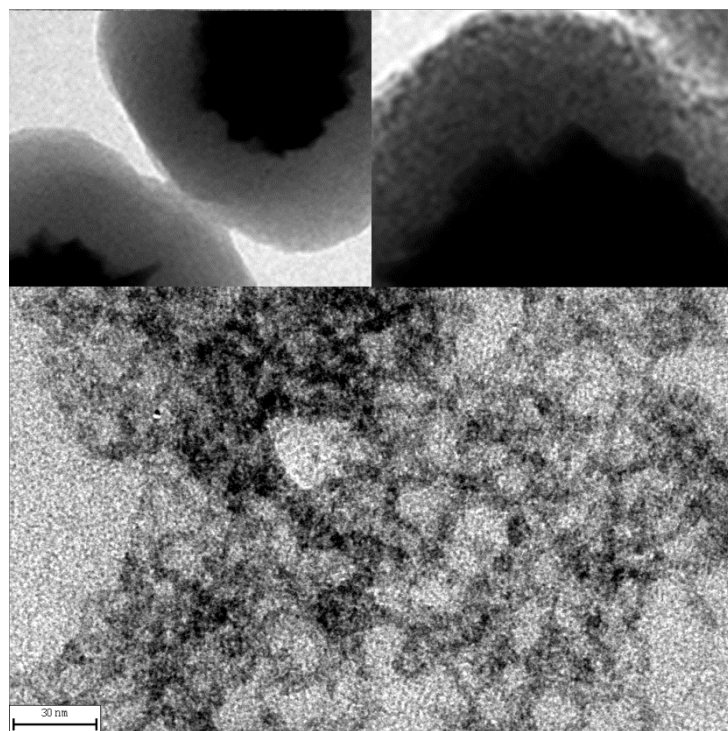

Figure S1. TEM images of QDs. The inset of top left corner and top right corner are the enlarged images of Au NF@SiO<sub>2</sub> and Au NF@SiO<sub>2</sub>@QDs (the silica shell thickness is 65 nm), respectively.

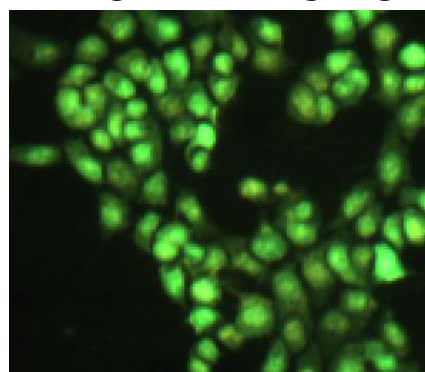

Figure S2. Viability staining of the MCF-7 breast cancer cells incubated with Au NF@SiO<sub>2</sub>@QDs and with irradiation of laser.

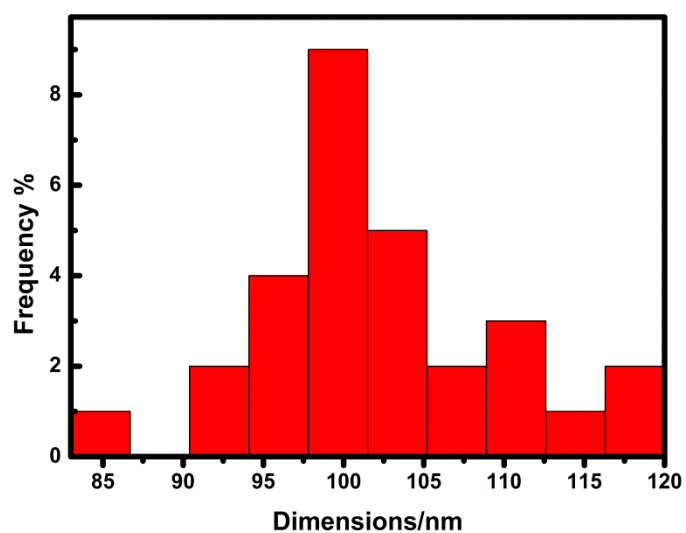

Figure S3. Histogram of the size distribution of AuNF

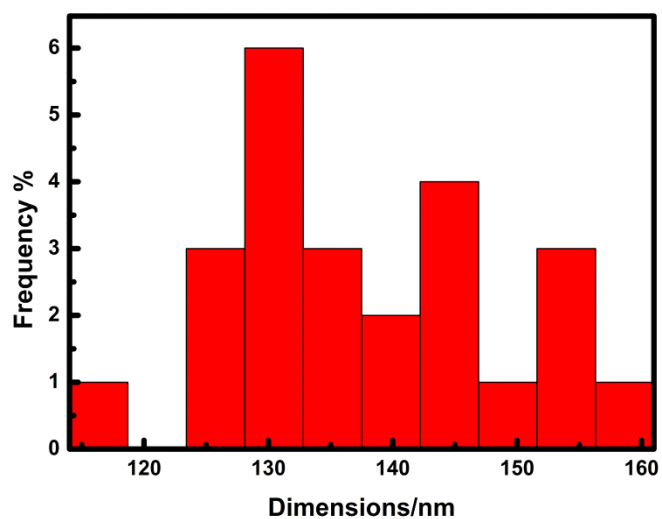

Figure S4. Histogram of the size distribution of AuNF@SiO<sub>2</sub>@QDs(the silica shell thickness is 16 nm)
